# Supplementary material for: Persistent infections in immunocompromised hosts are rarely sources of new pathogen variants
Source: PubMed Central journal article supplement — Virus Evol. 2017 Jul 28;3(2):vex018. doi: 10.1093/ve/vex018 (PMC5534129; doi:10.1093/ve/vex018), 2017-07-28
Supplement: vex018_supp.pdf [file vex018_supp.pdf]

# Persistent infections in immunocompromised hosts are rarely sources of new pathogen variants

Supplementary Material

John-Sebastian Eden<sup>1,2</sup>, Rebecca H. Chisholm<sup>3,4</sup>, Rowena A. Bull<sup>5</sup>, Peter A. White<sup>3</sup>, Edward C. Holmes<sup>1</sup>, Mark M. Tanaka<sup>3,4</sup>

<sup>1</sup> Marie Bashir Institute for Infectious Diseases and Biosecurity, Charles Perkins Centre, School of Biological Sciences and Sydney Medical School, The University of Sydney, Sydney 2006, Australia

<sup>2</sup> Centre for Virus Research, Westmead Millennium Institute, Westmead 2145, Australia

<sup>3</sup> School of Biotechnology and Biomolecular Sciences, University of New South Wales, Sydney 2052, Australia

<sup>4</sup> Evolution & Ecology Research Centre, University of New South Wales, Sydney 2052, Australia

<sup>5</sup> Systems Medicine, Inflammation and Infection Research Centre, School of Medical Sciences, Faculty of Medicine, University of New South Wales, Sydney 2052, Australia

In this supplementary material we provide

- A. Single-outbreak (SIR) model for Norovirus;
- B. Extended numerical results of the SIRS model for Norovirus;
- C. Taylor series approximation of the population-level relative substitution rate  $K_c$  for  $c \ll 1$ ;
- D. Extended numerical results of the SIRS model for Norovirus.
- E. Extended results of the sensitivity analysis of the SIRS model and SIR model for Norovirus.

## A Single-outbreak model for Norovirus

In this model we assume that the outbreak occurs on a time scale much faster than the loss of immunity so that  $\theta = \theta_c = 0$ . In this case the dynamics are governed by the following system of equations,

$$\begin{aligned}
 \frac{dI}{dt} &= \frac{\beta S}{N} (I + I_c(1 - q)) - \gamma I, \\
 \frac{dR}{dt} &= \gamma I, \\
 \frac{dI_c}{dt} &= \frac{\beta_c S_c}{N} (1 - q) (I + I_c(1 - q)) - \gamma_c I_c, \\
 \frac{dR_c}{dt} &= \gamma_c I_c.
 \end{aligned} \tag{A.1}$$

This model can be rescaled to,

$$\begin{aligned}
 \frac{di}{d\tau} &= \frac{\beta(1-c)}{\gamma} (1 - i - r) \left( i + i_c \frac{(1-q)c}{1-c} \right) - i, \\
 \frac{dr}{d\tau} &= i, \\
 \frac{di_c}{d\tau} &= \frac{\gamma_c}{\gamma} \left( \frac{\beta_c c}{\gamma_c} (1-q)^2 (1 - i_c - r_c) \left( i \frac{1-c}{c(1-q)} + i_c \right) - i_c \right), \\
 \frac{dr_c}{d\tau} &= \frac{\gamma_c}{\gamma} i_c.
 \end{aligned} \tag{A.2}$$

Here,  $I = i(1-c)N$ ,  $R = r(1-c)N$ ,  $S = (1-i-r)(1-c)N$ ,  $I_c = i_c cN$ ,  $R_c = r_c cN$ ,  $S_c = (1-i_c-r_c)cN$ ,  $t = \tau/\gamma$ .

## B Calculation of $R_0$ of the SIRS model for Norovirus

**Basic reproductive number.** Consider the SIRS model for Norovirus

$$\begin{aligned}\frac{dI}{dt} &= \frac{\beta S}{N} (I + I_c(1 - q)) - \gamma I, \\ \frac{dR}{dt} &= \gamma I - \theta R, \\ \frac{dI_c}{dt} &= \frac{\beta_c S_c}{N} (1 - q) (I + I_c(1 - q)) - \gamma_c I_c, \\ \frac{dR_c}{dt} &= \gamma_c I_c - \theta_c R_c.\end{aligned}\tag{B.1}$$

The next generation method [1] is used to derive the basic reproductive number  $\mathcal{R}_0$ . This technique is suitable for models where there are more than one class of infectives. Following the method outlined in [1], we define  $F$  to be the rate of appearance of new infections in the general population, and  $F_c$  to be the rate of appearance of new infections in the immunocompromised population when the population is wholly susceptible so that

$$\begin{aligned}F &= \beta(1 - c)(I + (1 - q)I_c) \\ F_c &= \beta_c c(1 - q)(I + (1 - q)I_c).\end{aligned}$$

We also define

$$V := V^- - V^+,$$

where  $V^+$  is the rate of transfer of infections into the general population by all other means and  $V^-$  is the rate of transfer of infections out of the general population. Similarly, we define

$$V_c := V_c^- - V_c^+,$$

where  $V_c^+$  is the rate of transfer of infections into the immunocompromised population by all other means and  $V_c^-$  is the rate of transfer of infections out of the immunocompromised population so that

$$\begin{aligned}V &= \gamma I \\ V_c &= \gamma_c I_c.\end{aligned}$$

We form the next generation matrix operator  $\mathcal{F}\mathcal{V}^{-1}$  from the matrices of partial derivatives of  $F$ ,  $F_c$ ,  $V$  and  $V_c$ :

$$\begin{aligned}\mathcal{F} &= \begin{bmatrix} \partial_I F & \partial_{I_c} F \\ \partial_I F_c & \partial_{I_c} F_c \end{bmatrix} = \begin{bmatrix} \beta(1 - c) & \beta(1 - q)(1 - c) \\ c\beta_c(1 - q) & c\beta_c(1 - q)^2 \end{bmatrix}, \\ \mathcal{V} &= \begin{bmatrix} \partial_I V & \partial_{I_c} V \\ \partial_I V_c & \partial_{I_c} V_c \end{bmatrix} = \begin{bmatrix} \gamma & 0 \\ 0 & \gamma_c \end{bmatrix},\end{aligned}$$

and then calculate  $\mathcal{R}_0$  as the largest eigenvalue of the matrix  $\mathcal{F}\mathcal{V}^{-1}$ . We find that

$$\mathcal{R}_0 = \frac{(1 - c)\beta}{\gamma} + \frac{c(1 - q)^2\beta_c}{\gamma_c}.\tag{B.2}$$

For  $c \ll 1$ ,  $\mathcal{R}_0 \approx \frac{\beta}{\gamma}$ .

## C Taylor series approximation of the population-level relative substitution rate at endemic equilibrium $K_c$

Consider the system of equations (B.1). We set each equation in (B.1) to zero to solve for the endemic equilibrium solutions  $(\hat{I}, \hat{R}, \hat{I}_c, \hat{R}_c)$  such that  $\hat{I} > 0$  and  $\hat{I}_c > 0$ . We do not reproduce the analytical expressions of these solutions here due to their size. However, they can be easily obtained using Mathematica.

We are interested in the population-level relative substitution rate at endemic equilibrium  $K_c$  which depends on these equilibrium solution according to

$$K_c = \left(\frac{k_c}{k}\right) \left(\frac{\hat{I}_c}{\hat{I}}\right). \quad (\text{C.1})$$

The proportion of immunocompromised hosts  $c$  is assumed to be small. Therefore we seek a Taylor series expansion of  $K_c$  around the point  $c = 0$  to approximate the solution for  $c \ll 1$ . Using Mathematica it can be shown that

$$\begin{aligned} K_c &= \left(\frac{k_c}{k}\right) \left(\frac{\hat{I}_c}{\hat{I}}\right) = \left(\frac{k_c}{k}\right) \left\{ \frac{c\beta\beta_c\theta_c(1-q)(\gamma+\theta)}{(\theta_c+\gamma_c)\beta_c(1-q)\theta(\beta-\gamma)+\beta\gamma_c\theta_c(\gamma+\theta)} + O(c^2) \right\} \\ &= c \left(\frac{k_c}{k}\right) \left( \left(1 - \frac{\gamma}{\beta}\right) \left( \frac{\frac{\gamma_c}{\theta_c} + 1}{\frac{\gamma}{\theta} + 1} + \frac{\gamma_c}{\beta_c(1-q)} \right) \right)^{-1} + O(c^2). \end{aligned} \quad (\text{C.2})$$

Therefore, the linear approximation for  $K_c$  around  $c = 0$  is

$$K_c \approx c \left(\frac{k_c}{k}\right) \left( \left(1 - \frac{\gamma}{\beta}\right) \left( \frac{\frac{\gamma_c}{\theta_c} + 1}{\frac{\gamma}{\theta} + 1} + \frac{\gamma_c}{\beta_c(1-q)} \right) \right)^{-1}. \quad (\text{C.3})$$

This approximation and the full numerical solution of  $K_c$  as a function of  $c$  are shown in Figure C.1 for one set of parameter values. The linear approximation is clearly close to the full solution for values of the proportion of immunocompromised hosts  $c$  up to around 0.03.

From Equation (C.3), it is clear that for small  $c$ ,  $K_c$  increases when either  $\beta_c(1-q)/\gamma_c$  or  $\theta_c/\gamma_c$  increase, and  $K_c$  decreases when either  $\beta/\gamma$  or  $\theta/\gamma$  increase. Hence, the population-level relative substitution rate at endemic equilibrium will increase if the mean number of secondary infections caused by an infective immunocompromised host ( $\beta_c(1-q)/\gamma_c$ ) increases, the infection duration of infective immunocompromised hosts ( $1/\gamma_c$ ) increases, the duration of immunity for immunocompromised hosts ( $1/\theta_c$ ) decreases, the mean number of secondary infections caused by an infective general host ( $\beta/\gamma$ ) decreases, the infection duration of infective general hosts ( $1/\gamma$ ) decreases, or the duration of immunity for general hosts ( $1/\theta$ ) increases.

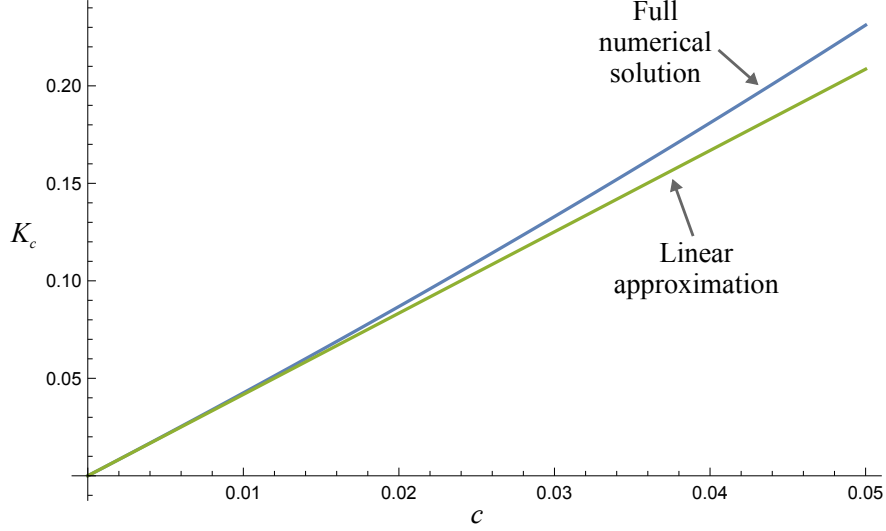

Figure C.1: **The population-level relative substitution rate at endemic equilibrium  $K_c$  as a function of the proportion of immunocompromised hosts  $c$ .** The blue line indicates the full numerical solution for  $K_c$ , and the green line is the linear approximation of  $K_c$  for  $c \ll 1$ . Here,  $k_c/k = 1$ ,  $\beta = 1.64/7$ ,  $\beta_c = 1.2\beta$ ,  $q = 0.5$ ,  $N = 1000$ ,  $\gamma = 1/7$ ,  $\gamma_c = 1/31$ ,  $\theta = 1/(5 \times 365)$ ,  $\theta_c = 1/(0.5 \times 365)$ .

## D Extended numerical results of the SIRS model for Norovirus.

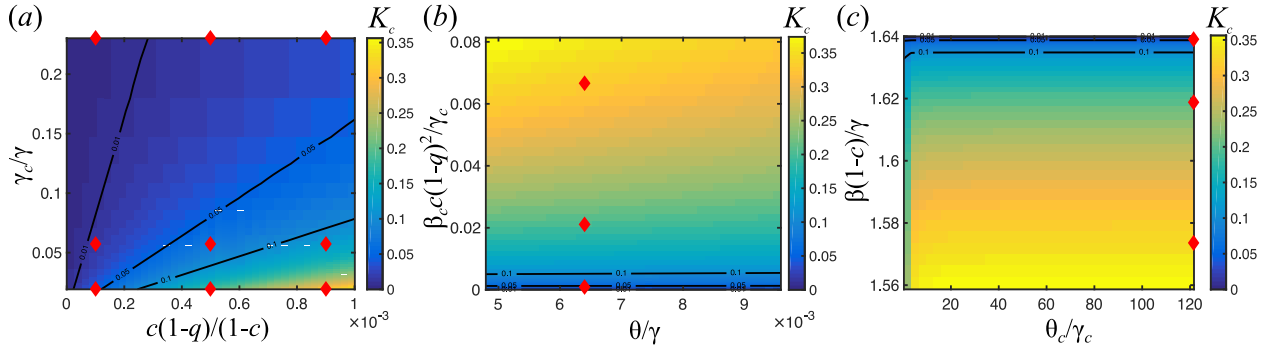

Figure D.1: **Extended numerical results for SIRS model for norovirus.** The relative substitution rate (at the population level) in the immunocompromised population versus the general population  $K_c$  when  $k_c/k = 5$  and  $N = 10^6$ . (a)  $R_0 = 1.64$ ,  $1/\theta_c = 3$  days,  $1/\gamma = 7$  days,  $c = 0.001$ ,  $1/\theta = 3$  years,  $k = 0.003$ ,  $1/\gamma_c \in [1/12, 1]$  years,  $q \in [0, 1]$ ; (b)  $R_0 = 1.64$ ,  $1/\gamma_c = 12$  months,  $1/\gamma = 7$  days,  $c = 0.001$ ,  $1/\theta_c = 3$  days,  $k = 0.003$ ,  $1/\theta \in [2, 4]$  years,  $q \in [0, 1]$ ; (c)  $R_0 = 1.64$ ,  $1/\gamma_c = 12$  months,  $1/\gamma = 7$  days,  $c = 0.001$ ,  $1/\theta = 3$  years,  $k = 0.003$ ,  $1/\theta_c \in [3 \text{ days}, 3 \text{ years}]$ ,  $q \in [0, 1]$ . Pink diamonds represent the best estimates of the parameters in the parameter space considered. The black lines correspond to the contours  $K_c = 0.1, 0.05, 0.01$ .

## E Extended results of the sensitivity analysis of the SIRS and SIR model for Norovirus.

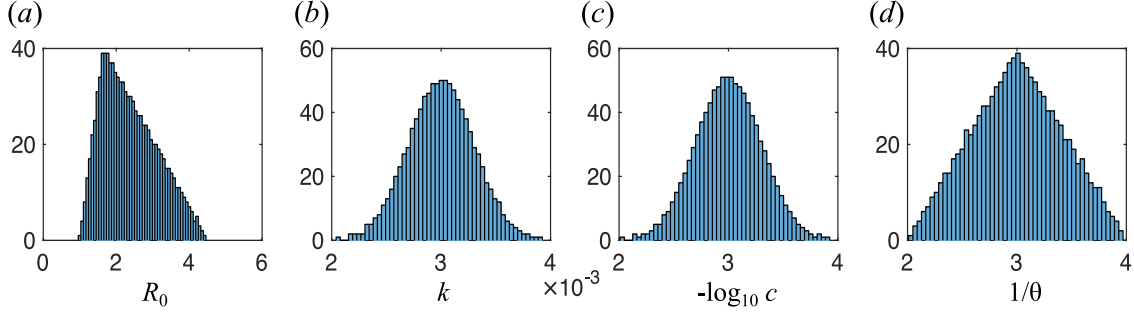

Figure E.1: **Parameter sample distributions used in the sensitivity analysis using the Latin Hypercubic Sampling method.** (a) The basic reproduction number ( $R_0$ ) was sampled from a triangular distribution with mode 1.64, lower bound 1 and upper bound 4.5; (b) the general population substitution rate ( $k$ ) was sampled from a normal distribution with mean 0.003 and standard deviation 0.0003; (c) the proportion of the population immunocompromised ( $c$ ) was sampled from a log normal distribution of base 10 such that  $-\log_{10} c \sim \mathcal{N}(3, 0.3)$ ; (d) the duration of immunity for the general population ( $1/\theta$ ) was sampled from a triangular distribution with mode 3, lower bound 2 and upper bound 4.

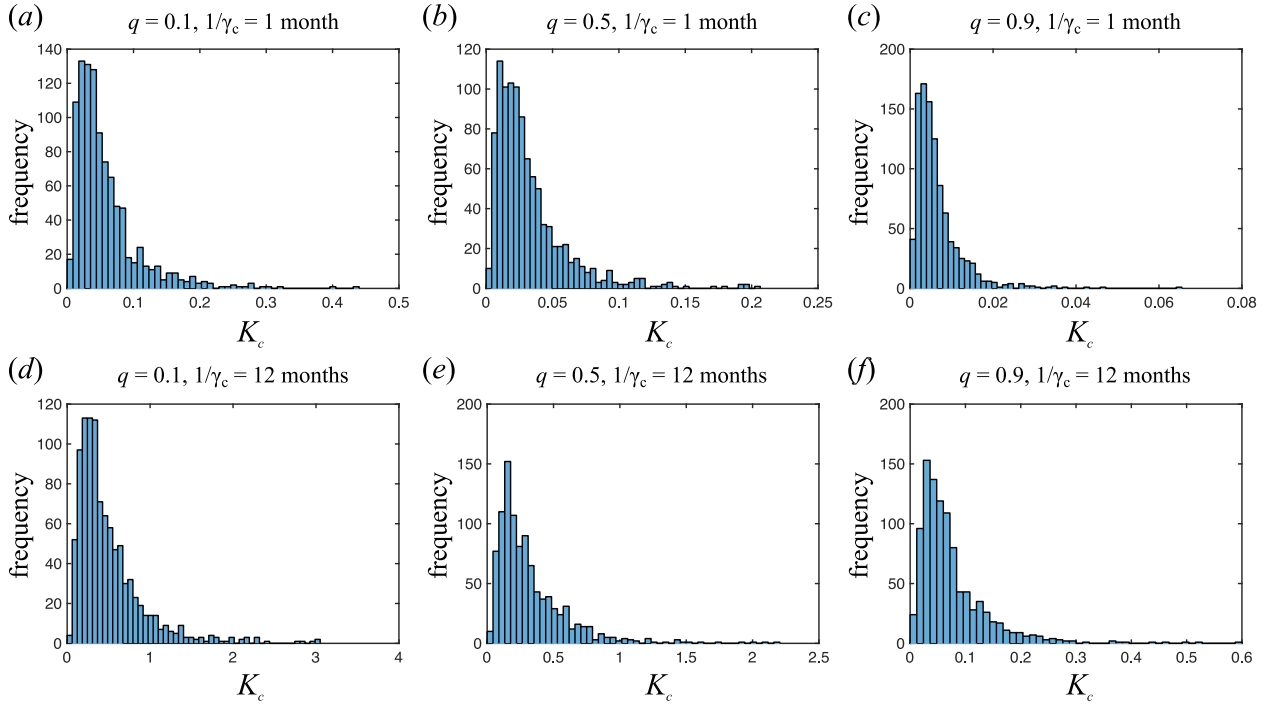

Figure E.2: **Frequency distribution of the relative substitution rate (at the population level) in the immunocompromised population versus the general population  $K_c$  from Latin Hypercubic Sampling of the parameters space.** (a)–(c)  $1/\gamma_c = 1$  month; (d)–(f)  $1/\gamma_c = 12$  months. (a),(d)  $q = 0.1$ ; (b),(e)  $q = 0.5$ ; (c),(f)  $q = 0.9$ . In all cases  $1/\gamma = 7$  days,  $N = 10^6$ ,  $1/\theta_c = 3$  days,  $k_c/k = 5$ .

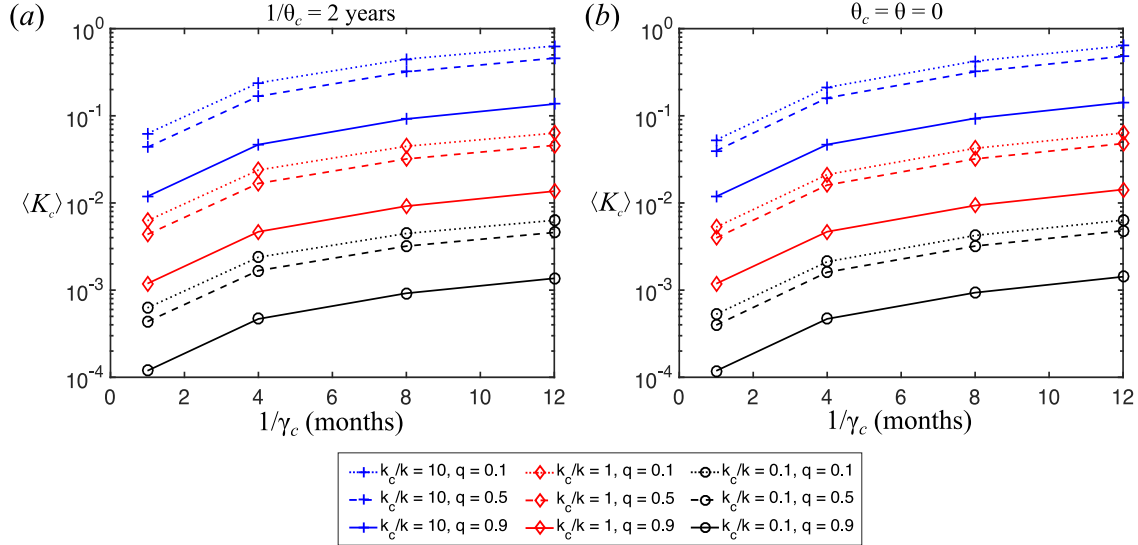

Figure E.3: **The mean relative substitution rate (at the population level) in the immunocompromised population versus the general population  $\langle K_c \rangle$**  from Latin Hypercubic Sampling of 1000 points in the parameters space  $(R_0, k, c, 1/\theta)$  as a function of the duration of infection in immunocompromised hosts  $1/\gamma_c$ , for a range of values of the quarantine parameter  $q$ , and the ratio of substitution rates (at the individual host level)  $k_c/k$ . (a) SIRS model with  $1/\theta_c = 2$  years and  $N = 10^6$ ; (b) SIR model ( $\theta_c = \theta = 0$ ) with  $N = 10^4$ . Blue lines with square markers indicate  $k_c/k = 10$ , red lines with diamond markers  $k_c/k = 1$ , and black lines with circle markers  $k_c/k = 0.1$ . Dotted lines indicate  $q = 0.1$ , dashed lines  $q = 0.5$  and solid lines  $q = 0.9$ . Here,  $1/\gamma = 7$  days.

Figure E.3 reveals that the SIRS model and SIR model behave similarly when the duration of immunity for the immunocompromised population is large.

## References

- [1] Heffernan J, Smith R, Wahl L (2005) Perspectives on the basic reproductive ratio. *J R Soc Interface.* 2:281–293.
